# Supplementary material
Source: PubMed Central journal article supplement (PMC5567872)
Supplement: NIHMS756114-supplement-supplemental.pdf [file NIHMS756114-supplement-supplemental.pdf]

**GPS-15-0054, "Genomic predictors of remission in geriatric depression using genome-wide expression analyses: a pilot study"**

**Supplement 1: Microarray genomic regulation differences between non-remitter and early remitter groups at baseline**

| Probe ID | Fold Change (abs) | Regulation | Symbol       | p-value  |
|----------|-------------------|------------|--------------|----------|
| 6370315  | 11.29394          | Down       | HLA-DRB5     | 0.005371 |
| 1230376  | 2.878403          | Down       | ALAS2        | 0.040313 |
| 7550292  | 2.587224          | Down       | SELENBP1     | 0.019046 |
| 2190139  | 2.538225          | Down       | CA1          | 0.02866  |
| 2350274  | 2.511729          | Down       | AHSP         | 0.010137 |
| 10681    | 2.421306          | Down       | LOC100131164 | 0.023538 |
| 2120152  | 2.399837          | Down       | SLC4A1       | 0.017559 |
| 5690187  | 2.360582          | Down       | EPB42        | 0.007224 |
| 4150563  | 2.320725          | Down       | C16orf35     | 0.017368 |
| 6860347  | 2.301184          | Down       | FAM46C       | 0.025754 |
| 1450358  | 2.297963          | Down       | HBD          | 0.00744  |
| 1510612  | 2.236673          | Down       | MYL4         | 0.034842 |
| 5960564  | 2.180386          | Down       | SNCA         | 0.03586  |
| 7610615  | 2.164032          | Down       | SLC6A10P     | 0.024972 |
| 4180768  | 2.156951          | Down       | ALAS2        | 0.00684  |
| 3140750  | 2.079619          | Down       | RBM38        | 0.008701 |
| 3840400  | 2.036645          | Down       | GMPR         | 0.043985 |
| 3420372  | 2.005976          | Down       | RBM38        | 0.025779 |

**Supplement 2: Gene ontology outputs from DAVID analysis for biologically significant functions relevant early remitters**

| Gene ontology details                              | P-value  | Genes                            |
|----------------------------------------------------|----------|----------------------------------|
| 002002; hemoglobin metabolic process               | 3.23E-05 | ALAS2, EPB42, AHSP               |
| 0050801; ion homeostasis                           | 0.004924 | ALAS2, EPB42, SNCA, SLC4A1       |
| 0005938; cell cortex                               | 0.005491 | EPB42, SNCA, SLC4A1              |
| 0048878; chemical homeostasis                      | 0.009184 | ALAS2, EPB42, SNCA, SLC4A1       |
| 0005833; hemoglobin complex                        | 0.009352 | AHSP, HBD                        |
| 0005829; cytosol                                   | 0.014651 | AHSP, SNCA, RBM38, SELENBP1, HBD |
| 0030097; hemopoiesis                               | 0.017825 | ALAS2, EPB42, AHSP               |
| 0048534; hemopoietic or lymphoid organ development | 0.021389 | ALAS2, EPB42, AHSP               |
| 0002520; immune system development                 | 0.023919 | ALAS2, EPB42, AHSP               |
| 0050821; protein stabilization                     | 0.024566 | AHSP, RBM38                      |
| 0042592; homeostatic process                       | 0.025726 | ALAS2, EPB42, SNCA, SLC4A1       |
| 0055072; iron ion homeostasis                      | 0.031483 | ALAS2, EPB42                     |
| 0031647; regulation of protein stability           | 0.036641 | AHSP, RBM38                      |
| 0030218; erythrocyte differentiation               | 0.037498 | ALAS2, EPB42                     |
| 0030863; cortical cytoskeleton                     | 0.037694 | EPB42, SLC4A1                    |
| 0006873; cellular ion homeostasis                  | 0.041895 | ALAS2, SNCA, SLC4A1              |
| 0034101; erythrocyte homeostasis                   | 0.042627 | ALAS2, EPB42                     |
| 0055082; cellular chemical homeostasis             | 0.043125 | ALAS2, SNCA, SLC4A1              |
| 0019725; cellular homeostasis                      | 0.062202 | ALAS2, SNCA, SLC4A1              |
| 0044448; cell cortex part                          | 0.063092 | EPB42, SLC4A1                    |
| 0008092; cytoskeletal protein binding              | 0.065602 | MYL4, SNCA, SLC4A1               |
| 0030017; sarcomere                                 | 0.074104 | MYL4, SLC4A1                     |
| 0030099; myeloid cell differentiation              | 0.079478 | ALAS2, EPB42                     |
| 0030016; myofibril                                 | 0.083553 | MYL4, SLC4A1                     |
| 0005856; cytoskeleton                              | 0.084634 | MYL4, EPB42, SNCA, SLC4A1        |
| 0044449; contractile fiber part                    | 0.084999 | MYL4, SLC4A1                     |
| 0048872; homeostasis of number of cells            | 0.085219 | ALAS2, EPB42                     |
| 0043292; contractile fiber                         | 0.090763 | MYL4, SLC4A1                     |
